# Supplementary material
Source: PubMed Central journal article supplement (PMC5971412)
Supplement: Online_Supplement_2.pdf [file Online_Supplement_2.pdf]

| Variable Name                                     | Source of data                | Description                                                                                                                    | Variable Name in Database | Values and Database Codes                                                                                                                                                                                                                                                           |
|---------------------------------------------------|-------------------------------|--------------------------------------------------------------------------------------------------------------------------------|---------------------------|-------------------------------------------------------------------------------------------------------------------------------------------------------------------------------------------------------------------------------------------------------------------------------------|
| <b>Main Comparison Groups</b>                     |                               |                                                                                                                                |                           |                                                                                                                                                                                                                                                                                     |
| EPI-User                                          | Primary data from EPI program | User of PEPP services, defined based on linked database from program which included data on program clients and psychiatrists. | N/A                       | All people in the cohort who are also represented in the PEPP data are classified as an EPI-user (1), those who were not in the EPI data but had been seen by an EPI psychiatrist are classified as screened (2), and all remaining cohort members are classified as a non-user (0) |
| <b>Baseline Socio-Demographic Characteristics</b> |                               |                                                                                                                                |                           |                                                                                                                                                                                                                                                                                     |
| Age at Index Date                                 | RPDB                          | Age at index date                                                                                                              | BDATE                     | Continuous variable calculated based on index date and birth date                                                                                                                                                                                                                   |
| Gender                                            | RPDB                          | Recorded sex                                                                                                                   | SEX                       | 1 = Male<br>2 = Female                                                                                                                                                                                                                                                              |
| Rural Residence                                   | RPDB                          | Rural place of residence, defined using the Rurality Index of Ontario. Areas with score of 40 or above are considered rural.   | RIO2008                   | 1 = Rural<br>0 = Non-Rural                                                                                                                                                                                                                                                          |
| Resides Outside of Catchment Area                 | RPDB                          | Whether the patient resides outside of the EPI catchment area, based on list of postal codes for EPI program catchment area    | PSTLCODE                  | 1 = Yes<br>2 = No                                                                                                                                                                                                                                                                   |
| Residential Instability                           | ONMARG                        | Neighbourhood-level indicator of residential instability constructed based on census data                                      | INSTABILITY_Q_CSD         | 1 = Least Marginalized<br>5 = Most Marginalized                                                                                                                                                                                                                                     |
| Deprivation                                       | ONMARG                        | Neighbourhood-level indicator of material deprivation constructed based on census data                                         | DEPRIVATION_Q_CSD         | 1 = Least Marginalized<br>5 = Most Marginalized                                                                                                                                                                                                                                     |
| Ethnic Concentration                              | ONMARG                        | Neighbourhood-level indicator of ethnic concentration constructed based on census data                                         | ETHNICCON_Q_CSD           | 1 = Least Marginalized<br>5 = Most Marginalized                                                                                                                                                                                                                                     |
| Dependency                                        | ONMARG                        | Neighbourhood-level indicator of social dependency constructed based on census data                                            | DEPENDENCY_Q_CSD          | 1 = Least Marginalized<br>5 = Most Marginalized                                                                                                                                                                                                                                     |
| Income Quintile                                   | RPDB                          | Neighbourhood-level income quintile                                                                                            | INCQUINT                  | 1 = Lowest Income Quintile<br>5 = Highest Income Quintile                                                                                                                                                                                                                           |
| Migrant Status                                    | IRCC                          | Migrant status for first-generation immigrants and refugees (since 1985)                                                       | CATEG                     | 0 = Non-Migrants (Not Included in IRCC Database)<br>1 = Immigrant (All Codes not Listed Below)<br>2 = Refugee (020-029,031-034,037,047-049,052-055,080,086-089,094-095,120-142,153)                                                                                                 |

| Variable Name                               | Source of data          | Description                                                                                                                         | Variable Name in Database                                                                        | Values and Database Codes                                                                                                                                                                                    |
|---------------------------------------------|-------------------------|-------------------------------------------------------------------------------------------------------------------------------------|--------------------------------------------------------------------------------------------------|--------------------------------------------------------------------------------------------------------------------------------------------------------------------------------------------------------------|
| <b>Baseline Service-Use Characteristics</b> |                         |                                                                                                                                     |                                                                                                  |                                                                                                                                                                                                              |
| Index Diagnosis                             | DAD, OMHRS, OHIP, NACRS | Diagnostic category of index diagnosis                                                                                              | DXCODE, DX10CODE (DAD)<br>AXIS1_DSM4CODE_DISCH1<br>(OMHRS)<br>DXCODE (OHIP)<br>DX10CODE1 (NACRS) | 1 = Schizophrenia & Schizoaffective Disorder (ICD-9 = 295.X; ICD-10 = F20, F25)<br>2 = Delusional Disorder (ICD-9 = 297.X; ICD-10 = F22, F24)<br>3 = Other Psychoses (ICD-9 = 298.X; ICD-10 = F23, F28, F29) |
| Year                                        | DAD, OMHRS, OHIP, NACRS | Year of index diagnosis                                                                                                             | DDATE (DAD, OMHRS)<br>SERVDATE (OHIP)<br>REGDATE (NACRS)                                         | N/A                                                                                                                                                                                                          |
| Discordant Diagnosis                        | OHIP, NACRS             | If diagnosis based on physician or emergency department visits, whether the diagnostic category was discordant across the diagnosis | See description of Index Diagnosis                                                               | 1 = Discordant Diagnoses<br>0 = Concordant Diagnoses                                                                                                                                                         |
| Diagnosing Physician                        | DAD, OMHRS, OHIP, NACRS | Specialty of physician making the index diagnosis                                                                                   | SPEC (OHIP)<br>PRVSERV1-10 (NACRS)                                                               | 1 = Family Physician (00001)<br>2 = Psychiatrist (00064, 00065; All claims from DAD and OMHRS)<br>3 = Family Physician + Psychiatrist (see above)<br>4 = Other (all other codes)                             |
| Inpatient at Index Diagnosis                | DAD, OMHRS, OHIP, NACRS | Measured as a dichotomous outcome, whether individuals are inpatients at time of index diagnosis                                    | N/A                                                                                              | 1 = Inpatient at Index Diagnosis (source DAD or OMHRS)<br>0 = Outpatient at Index Diagnosis (source OHIP or NACRS)                                                                                           |
| Prior Alcohol Related Disorder              | DAD, OMHRS, OHIP, NACRS | Whether person had contact with services for alcohol-related disorders prior to the index date.                                     | DXCODE, DX10CODE (DAD)<br>AXIS1_DSM4CODE_DISCH1<br>(OMHRS)<br>DXCODE (OHIP)<br>DX10CODE1 (NACRS) | 1 = Prior contact with services for alcohol-related disorders (ICD-10 = F10; ICD-9 = 291.X, 303.X, 305.0)<br>0 = No prior contact with services for alcohol-related disorders                                |
| Prior Substance Related Disorder            | DAD, OMHRS, OHIP, NACRS | Whether person had contact with services for substance-related disorders prior to the index date.                                   | DXCODE, DX10CODE (DAD)<br>AXIS1_DSM4CODE_DISCH1<br>(OMHRS)<br>DXCODE (OHIP)<br>DX10CODE1 (NACRS) | 1 = Prior contact with services for substance-related disorders (ICD-10 = F11-F19, F55; ICD-9 = 292.X, 304.X, 305.2-305.9)<br>0 = No prior contact with services for alcohol-related disorders               |

| Variable Name                                        | Source of data | Description                                                                                                                                                                            | Variable Name in Database                                  | Values and Database Codes                                                                                                                                                                                        |
|------------------------------------------------------|----------------|----------------------------------------------------------------------------------------------------------------------------------------------------------------------------------------|------------------------------------------------------------|------------------------------------------------------------------------------------------------------------------------------------------------------------------------------------------------------------------|
| Family Physician Contact in Previous 6 Months        | OHIP           | Any primary care visit for a mental health reason in the previous 6 months, defined as all mental health service codes and general service codes with a mental health diagnostic code. | Algorithm Description:<br>Med Care:42(10),960-965          | 1 = Contact with Family Physician<br>0 = No Contact with Family Physician                                                                                                                                        |
| Psychiatrist Contact in Previous 6 Months            | OHIP           | Any outpatient psychiatry visit in the previous 6 months                                                                                                                               | SPEC                                                       | 1 = Contact with Psychiatrist (00064, 00065)<br>0 = No Contact with Psychiatrist                                                                                                                                 |
| Emergency Department Visit in Previous 6 Months      | NACRS          | Any emergency department visit for a mental health reason in the previous 6 months                                                                                                     | DX10CODE1                                                  | 1 = Emergency Department Visit (ICD-10 = All F codes; ICD-9 = 291.x,292.x,and 295.x-319.x; Transfers excluded)<br>0 = No Emergency Department Visit                                                              |
| Psychiatric Hospitalization in Previous 6 Months     | DAD, OMHRS     | Any hospitalization in the previous 6 months with a primary discharge diagnosis of a mental disorder                                                                                   | DXCODE, DX10CODE (DAD)<br>AXIS1_DSM4CODE_DISCH1<br>(OMHRS) | 1 = Psychiatric Hospitalization (ICD-10 = All F Codes; ICD-9 = 291.x, 292.x, and 294.x-319.x; OMHRS = All hospitalizations EXCEPT 293.X, 780.X, 290.X, 294.X, and V codes)<br>0 = No Psychiatric Hospitalization |
| Total Psychiatric Hospital Days in Previous 6 Months | DAD, OMHRS     | Total number of psychiatric hospital days in the previous 6 months                                                                                                                     | LOS                                                        | Continuous variable                                                                                                                                                                                              |
| <b>Outcome Variables</b>                             |                |                                                                                                                                                                                        |                                                            |                                                                                                                                                                                                                  |
| Contact with Primary Care                            | OHIP           | Any primary care visit for a mental health reason after EPI admission, defined as all mental health service codes and general service codes with a mental health diagnostic code.      | Algorithm Description:<br>Med Care:42(10),960-965          | 1 = Contact with Family Physician<br>0 = No Contact with Family Physician                                                                                                                                        |
| Contact with Psychiatrist                            | OHIP           | Any outpatient psychiatry visit after EPI admission                                                                                                                                    | SPEC                                                       | 1 = Contact with Psychiatrist (00064, 00065)<br>0 = No Contact with Psychiatrist                                                                                                                                 |
| Emergency Department Visits                          | NACRS          | Any emergency department visit for a mental health reason after EPI admission                                                                                                          | DX10CODE1                                                  | 1 = Emergency Department Visit (ICD-10 = All F codes; ICD-9 = 291.x,292.x,and 295.x-319.x; Transfers excluded)<br>0 = No Emergency Department Visit                                                              |
| Psychiatric Hospitalizations                         | DAD, OMHRS     | Any hospitalization after EPI admission with a primary discharge diagnosis of a mental disorder                                                                                        | DXCODE, DX10CODE (DAD)<br>AXIS1_DSM4CODE_DISCH1<br>(OMHRS) | 1 = Psychiatric Hospitalization (ICD-10 = All F Codes; ICD-9 = 291.x, 292.x, and 294.x-319.x; OMHRS = All hospitalizations EXCEPT 293.X, 780.X, 290.X, 294.X, and V codes)<br>0 = No Psychiatric Hospitalization |

| Variable Name         | Source of data   | Description                                                                                                                             | Variable Name in Database                                                                                                                  | Values and Database Codes                                                                                                                                                                                                                                                                                                                                                                                        |
|-----------------------|------------------|-----------------------------------------------------------------------------------------------------------------------------------------|--------------------------------------------------------------------------------------------------------------------------------------------|------------------------------------------------------------------------------------------------------------------------------------------------------------------------------------------------------------------------------------------------------------------------------------------------------------------------------------------------------------------------------------------------------------------|
| Involuntary Admission | DAD, OMHRS, OHIP | Any involuntary admission after EPI admission, including involuntary status in the emergency department and involuntary hospitalization | ADMMETH (DAD)<br>PT_STATUS (OMHRS)<br>FEEDCODE (OHIP)                                                                                      | 1 = Involuntary Admission (ADMMETH = D, E; PT_STATUS = 1, 4; FEEDCODE = K623, K624)                                                                                                                                                                                                                                                                                                                              |
| Self-Harm Behaviour   | NACRS            | Any ED visit for self-harm after EPI admission                                                                                          | DX10CODE1                                                                                                                                  | 1 = Self-Harm Behaviour (ICD9 = E950-E959; ICD 10 = X60-X84)<br>0 = No Self-Harm Behaviour                                                                                                                                                                                                                                                                                                                       |
| Suicide               | ORGD             | Death by suicide after EPI admission                                                                                                    | SUICIDE, DX9CODE, EALIVE,<br>DX10CODE1-25, DISCHDISP<br>(DAD)<br>DISCHREASON (OMHRS)<br>DX10CODE1-10, VISDISP2002<br>(NACRS)<br>COD (ORGD) | 1 = Suicide <ul style="list-style-type: none"> <li>• DAD: <ul style="list-style-type: none"> <li>i. SUICIDE = 1, or</li> <li>ii. DX9CODE = E950-E959 and EALIVE = X, or</li> <li>iii. DX10CODE1-25 = X60-84 and DISCHDISP = 07</li> </ul> </li> <li>• OMHRS: DISCHREASON (X90) = 2</li> <li>• NACRS: DX10CODE1-10 = X60-84 and VISDISP2002 = 10 or 11</li> <li>• ORGD: COD = E950-E959</li> </ul> 0 = No Suicide |
| All-Cause Mortality   | ORGD             | Death by any cause after EPI admission                                                                                                  | DTHDATE                                                                                                                                    | 1 = Death after EPI admission<br>0 = Alive                                                                                                                                                                                                                                                                                                                                                                       |
